# Supplementary material
Source: publisher site journal article supplement (https://static.cambridge.org/content/id/urn:cambridge.org:id:article:S0376892920000235/resource/name/S0376892920000235supp001.docx)
Supplement: Supplementary file 1 [file S0376892920000235supp001.docx]

**Table S1: Coding results for signal annotation (Coder A & Coder B)**

|  | | **Coder B** | |
| --- | --- | --- | --- |
| **Signal** | **Non-signal** |
| **Coder A** | **Signal** | 632 | 6 |
| **Non-signal** | 9 | 9656 |

**Note:** In our species identification coding, the average kappa value was 0.96 with the specific kappa value for each species as follow: elephant (0.98), rhino (0.97), and hawksbill (0.96).
